# Supplementary material
Source: publisher figshare collection journal article supplement (https://karger.figshare.com/ndownloader/files/10622020)
Supplement: Supplementary file 1 [file 10622020]

## **Materials and Methods**

In October 2017, two research personnel searched PubMed, Google Scholar, and ClinicalTrials.gov for articles and clinical trials investigating the prevalence, comorbidities, genetics, and anatomical basis of HS, with a focus on patients with SOC. The search terms used included “hidradenitis suppurativa,” “acne inversa,” “skin of color,” “incidence,” “prevalence,” “comorbidities,” “socioeconomic status,” “genetics,” “anatomy,” and the names of emerging systemic agents for HS (e.g., adalimumab). Articles were excluded if not written in English. In the end, 47 studies were included in this review.
